# Supplementary material
Source: PubMed Central journal article supplement (PMC3435227)
Supplement: 1206410109_pnas.201206410SI.pdf [file 1206410109_pnas.201206410SI.pdf]

# Supporting Information

Lee et al. 10.1073/pnas.1206410109

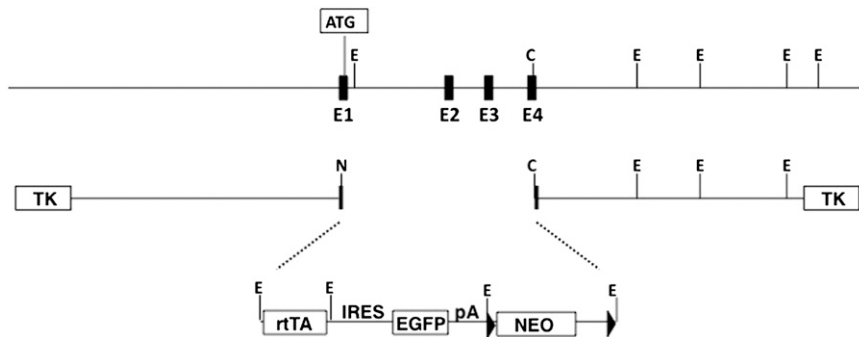

**Fig. S1.** *Pax7* targeting strategy. The gene structure is shown in the top line, with the targeting construct below. In the targeted allele, most of the coding sequence (E1–E4) was removed and replaced with a cassette encoding the reverse tetracycline transactivator (rtTA) and EGFP followed by a neomycin resistance expression cassette (NEO) flanked by LoxP sites (triangles). The NEO cassette was removed by crossing mice carrying the targeted allele with Ella-cre transgenic mice.

**Table S1.** Effect of ACVR2B/Fc on muscle weights (mg) in *Pax7<sup>CE</sup>*, *R26R<sup>LacZ</sup>* mice

| Variable                  | Pectoralis  | Triceps                  | Quadriceps               | Gastrocnemius            | Tibialis    |
|---------------------------|-------------|--------------------------|--------------------------|--------------------------|-------------|
| <b>Males</b>              |             |                          |                          |                          |             |
| PBS ( <i>n</i> = 4)       | 77.0 ± 2.7  | 98.5 ± 2.0               | 193.3 ± 8.7              | 138.0 ± 4.5              | 59.3 ± 2.9  |
| ACVR2B/Fc ( <i>n</i> = 4) | 92.3 ± 1.4* | 124.3 ± 1.8 <sup>†</sup> | 230.8 ± 7.7 <sup>‡</sup> | 166.5 ± 8.2 <sup>‡</sup> | 80.0 ± 1.2* |
| <b>Females</b>            |             |                          |                          |                          |             |
| PBS ( <i>n</i> = 7)       | 49.8 ± 1.7  | 67.0 ± 2.8               | 130.1 ± 2.8              | 87.9 ± 3.1               | 45.3 ± 2.1  |
| ACVR2B/Fc ( <i>n</i> = 5) | 71.6 ± 4.0* | 100.5 ± 4.9 <sup>†</sup> | 192.1 ± 13.5*            | 122.3 ± 9.4 <sup>‡</sup> | 64.8 ± 4.8* |

\**P* < 0.01 vs. PBS; <sup>†</sup>*P* < 0.001 vs. PBS; <sup>‡</sup>*P* < 0.05 vs. PBS.
